# Supplementary material for: Automatic recognition of murmurs of ventricular septal defect using convolutional recurrent neural networks with temporal attentive pooling
Source: PubMed Central journal article supplement (PMC7732853; doi:10.1038/s41598-020-77994-z), 2020-12-11
Supplement: 41598_2020_77994_MOESM1_ESM.pdf [file 41598_2020_77994_MOESM1_ESM.pdf]

## Appendix

Supplemental Table 1.

Positive and negative events in the CNN model to recognize systolic murmur and normal heart sounds.

|                               | Echocardiographic diagnosis |        |
|-------------------------------|-----------------------------|--------|
|                               | VSD                         | Normal |
| <b>CNN model test results</b> |                             |        |
| Murmur-like                   | 156                         | 9      |
| Normal-like                   | 22                          | 51     |

Supplemental Table 2.

Positive and negative events in the CRNN model to recognize systolic murmur and normal heart sounds.

|                                | Echocardiographic diagnosis |        |
|--------------------------------|-----------------------------|--------|
|                                | VSD                         | Normal |
| <b>CRNN model test results</b> |                             |        |
| Murmur-like                    | 163                         | 4      |
| Normal-like                    | 15                          | 56     |

Supplemental Table 3.

Positive and negative events in the TAP-CRNN model to recognize systolic murmur and normal heart sounds.

|                                    | Echocardiographic diagnosis |        |
|------------------------------------|-----------------------------|--------|
|                                    | VSD                         | Normal |
| <b>TAP-CRNN model test results</b> |                             |        |
| Murmur-like                        | 172                         | 1      |
| Normal-like                        | 6                           | 59     |

Supplemental Table 4.

Positive and negative events in the TAP-CRNN model to recognize systolic murmur and normal heart sounds in the aortic area.

|                                    | Echocardiographic diagnosis |        |
|------------------------------------|-----------------------------|--------|
|                                    | VSD                         | Normal |
| <b>TAP-CRNN model test results</b> |                             |        |
| Murmur-like                        | 42                          | 1      |
| Normal-like                        | 2                           | 11     |

Supplemental Table 5.

Positive and negative events in the TAP-CRNN model to recognize systolic murmur and normal heart sounds in pulmonic areas.

|                                    | Echocardiographic diagnosis |        |
|------------------------------------|-----------------------------|--------|
|                                    | VSD                         | Normal |
| <b>TAP-CRNN model test results</b> |                             |        |
| Murmur-like                        | 32                          | 0      |
| Normal-like                        | 2                           | 12     |

Supplemental Table 6.

Positive and negative events in the TAP-CRNN model to recognize systolic murmur and normal heart sounds in the second aortic area.

|                                    | Echocardiographic diagnosis |        |
|------------------------------------|-----------------------------|--------|
|                                    | VSD                         | Normal |
| <b>TAP-CRNN model test results</b> |                             |        |
| Murmur-like                        | 33                          | 0      |
| Normal-like                        | 0                           | 12     |

Supplemental Table 7.

Positive and negative events in the TAP-CRNN model to recognize systolic murmur and normal heart sounds in the tricuspid area.

|                                    | Echocardiographic diagnosis |        |
|------------------------------------|-----------------------------|--------|
|                                    | VSD                         | Normal |
| <b>TAP-CRNN model test results</b> |                             |        |
| Murmur-like                        | 33                          | 0      |
| Normal-like                        | 0                           | 12     |

Supplemental Table 8.

Positive and negative events in the TAP-CRNN model to recognize systolic murmur and normal heart sounds in the mitral area.

|                                    | Echocardiographic diagnosis |        |
|------------------------------------|-----------------------------|--------|
|                                    | VSD                         | Normal |
| <b>TAP-CRNN model test results</b> |                             |        |
| Murmur-like                        | 32                          | 0      |
| Normal-like                        | 2                           | 12     |
